# Supplementary material for: Collaborative and privacy-preserving retired battery sorting for profitable direct recycling via federated machine learning
Source: PubMed Central journal article supplement (PMC10697957; doi:10.1038/s41467-023-43883-y), 2023-12-05
Supplement: 41467_2023_43883_MOESM2_ESM.pdf [file 41467_2023_43883_MOESM2_ESM.pdf]

Collaborative and privacy-preserving retired battery sorting for profitable direct recycling via federated machine learning

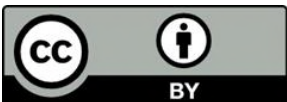

**Open Access** This file is licensed under a Creative Commons Attribution 4.0 International License, which permits use, sharing, adaptation, distribution and reproduction in any medium or format, as long as you give appropriate credit to the original author(s) and the source, provide a link to the Creative Commons license, and indicate if changes were made. In the cases where the authors are anonymous, such as is the case for the reports of anonymous peer reviewers, author attribution should be to 'Anonymous Referee' followed by a clear attribution to the source work. The images or other third party material in this file are included in the article's Creative Commons license, unless indicated otherwise in a credit line to the material. If material is not included in the article's Creative Commons license and your intended use is not permitted by statutory regulation or exceeds the permitted use, you will need to obtain permission directly from the copyright holder. To view a copy of this license, visit <http://creativecommons.org/licenses/by/4.0/>.

## **REVIEWER COMMENTS**

### **Reviewer #1 (Remarks to the Author):**

The paper presents an innovative approach to retired battery sorting using federated machine learning while considering data privacy concerns. With some clarifications, additional details, and the incorporation of comparative analysis, this work has the potential to significantly contribute to the field of battery recycling and collaborative machine learning. I recommend this paper for acceptance pending the suggested revisions.

1. To preprocess data in different clients and reduce the interference of "noisy" data, do the authors have good methods?
2. CNN-based methods usually have a better prediction accuracy based on a large dataset, why not use this method in this paper?
3. In the proposed federated machine learning framework, how to transfer parameters and ensure to avoid missing the received parameters data?

### **Reviewer #2 (Remarks to the Author):**

The proposed paper raises an important topic in the context of sustainable development and the policy of product life cycle in the closed circular economy model. It has been proposed to use Federated Machine Learning to classify retired batteries (in particular cathode material sorting), assuming that prior information about historical operating conditions is known simultaneously in accordance with protecting the personal data of recyclers. However, I have the following concerns:

1. Thus, the decision trees are a commonly used approach, it is not known whether the authors developed and implemented the codes themselves, or whether they used ready-made Matlab-type packages or ready-made libraries in the Python language.

2. There is also no description of the neural network (including its structure/topology, number of layers, number of neurons, input description, output description, and network diagram). Some explanations/arguments for the selection of a neural network just as proposed should also be given.

3. Does the use of the proposed approach allow you to reduce the costs of recycling (taking into account the rescaling of the procedure and its implementation in practice) compared to the procedure of extracting natural resources? What is the main conclusion of the article? This should be clearly stated in the article, especially in the Abstract.

4. Thus, the information concerning testing the retired batteries at the current cycle, specifically, with a complete charging-discharging cycle is not the common approach in the case of general lithium-ion batteries. The lithium-ion batteries come not only from electric vehicles, thus the authors will praise their method as one that does not require knowledge of historical data on battery life, while very often this data is unknown, also user data are unknown (so it is not possible to use them in calculations anyway). This is possible only in the case of batteries coming from electric vehicles. What chances does the proposed technique have for practical application?

5. Some last references in the field of retired batteries with Machine Learning are also missing:

- Zhang, Y., Tang, Q., Zhang, Y. et al. Identifying degradation patterns of lithium ion batteries from impedance spectroscopy using machine learning. Nat Commun 11, 1706 (2020).

<https://doi.org/10.1038/s41467-020-15235-7>

- Lv, C., Zhou, X., Zhong, L., Yan, C., Srinivasan, M., Seh, Z. W., Liu, C., Pan, H., Li, S., Wen, Y., Yan, Q., Machine Learning: An Advanced Platform for Materials Development and State Prediction in Lithium-Ion Batteries. Adv. Mater. 2022, 34, 2101474.

<https://doi.org/10.1002/adma.202101474>

- Ng, M.F., Zhao, J., Yan, Q. et al. Predicting the state of charge and health of batteries using data-driven machine learning. Nat Mach Intell 2, 161–170 (2020). <https://doi.org/10.1038/s42256-020-0156-7>

6. And finally, the Figures are of low quality. This issue should be definitively improved.

Thus, this paper is very interesting and the results obtained are of high importance taking into account environmental-based issues. However, due to the above comments, I would recommend the article for publication, provided that the above concerns will be addressed. I recommend a Major Revision.

## Response to Reviewer Comments

\*\*\*\*\*

|                      |                                                                                                                                                                                                       |
|----------------------|-------------------------------------------------------------------------------------------------------------------------------------------------------------------------------------------------------|
| <b>Title</b>         | Collaborative retired battery sorting for efficient and profitable recycling via federated machine learning                                                                                           |
| <b>Revised title</b> | Collaborative and privacy-preserving retired battery sorting for profitable direct recycling via federated machine learning                                                                           |
| <b>Authors</b>       | Shengyu Tao, Haizhou Liu, Chongbo Sun, Haocheng Ji, Guanjun Ji, Zhiyuan Han, Runhua Gao, Jun Ma, Ruifei Ma, Yuou Chen, Shiyi Fu, Yu Wang, Yaojie Sun, Yu Rong, Xuan Zhang, Guangmin Zhou, Hongbin Sun |
| <b>Journal</b>       | Nature Communications                                                                                                                                                                                 |
| <b>Manuscript ID</b> | NCOMMS-23-27860                                                                                                                                                                                       |

\*\*\*\*\*

### Table of Contents

|   |                               |    |
|---|-------------------------------|----|
| 1 | Response to Reviewers.....    | 2  |
| 2 | Response to Reviewer #1 ..... | 2  |
| 3 | Response to Reviewer #2.....  | 13 |
| 4 | References.....               | 26 |

5 **Response to Reviewers**

6 **Response to Reviewer #1**

7 The paper presents an innovative approach to retired battery sorting using federated  
8 machine learning while considering data privacy concerns. With some clarifications,  
9 additional details, and the incorporation of comparative analysis, this work has the potential  
10 to significantly contribute to the field of battery recycling and collaborative machine learning.  
11 I recommend this paper for acceptance pending the suggested revisions.

12 Dear Respected Reviewer,

13 Thank you very much for your recognition of our paper. We are very pleased that you  
14 find our work innovative and significant to battery recycling using the proposed federated  
15 machine learning.

16 Your constructive comments, covering various aspects such as data preprocessing,  
17 machine learning algorithms, and intermediate parameter transfer, are truly instrumental  
18 in guiding us to clarify our research details and contemplate our research implications. In  
19 the following of the section, we respectfully respond to your suggestions point by point.  
20 Accordingly, we make careful revisions to the original manuscript and supplementary  
21 information, where you could find the according revisions using “track changes” mode. We  
22 truly hope that the responses appropriately address your justified concerns, and that the  
23 revised manuscript lives up to your expectations of a decent *Nature Communications*  
24 publication.

25

26 1. To preprocess data in different clients and reduce the interference of “noisy” data, do  
27 the authors have good methods?

28 Thank you for your inquiry on the data preprocessing/denoising techniques of the  
29 proposed federated machine learning framework. We deeply agree with you on their  
30 importance as critical preparatory steps, as the data would heavily influence the quality of  
31 the as-trained battery sorting models.

32 Data preprocessing is of critical challenge for collaborative battery recycling scenarios.  
33 Such challenges stem from three main reasons: (1) Each client (collaborator) has diverse  
34 preferences for data preprocessing. This divergence might be attributed to the knowledge  
35 levels of the client's data experts, varying preprocessing costs, and different local model  
36 accuracy requirements, which can be regarded as *human-induced noise*. (2) Each client  
37 may possess multiple cathode material types. Heterogeneous battery data distributions  
38 among cathode diversities might necessitate changing data preprocessing methodologies,  
39 such as feature engineering, as well as parameter settings. This can be considered the  
40 *cathode heterogeneity-induced noise*. (3) For each type of battery material within one  
41 specific client, the battery testing conditions (including testing methodologies, testing  
42 parameters, and measurement errors) can impact data quality. This can be considered  
43 *measurement noise*. We would like to start with the *measurement noise* since it is common  
44 to consider for all machine learning settings.

45 To align the preprocessing across different clients, the recycler distributes a unanimous  
46 preprocessing protocol to the collaborators, such that all the distributed datasets are  
47 standardized in the same fashion. The protocol involves three consecutive steps: denoising  
48 (which you kindly pointed out), curve filling, and feature engineering.

49 (a) **Denoising.** Measurement noises arise inevitably from various sources, including  
50 deviations in battery testing methods, testing parameters, and real-time measurements.  
51 To maximally alleviate the impact of these noises, each collaborating manufacturer takes  
52 the following 3 approaches in sequential order:

53 a1. Identify out-of-cycle missing data entries and refill them with their nearest non-  
54 missing data entries.

55 a2. Identify in-cycle outlier data entries, and replace them with their nearest non-outlier  
56 data entries. Here, we define a data entry as an “outlier” if it has a median deviation of at  
57 least  $n=3$  times the Median Absolute Deviation (MAD) of the original data vector.

58 a3. Perform moving median filtering on the data. Each data entry is replaced with the  
59 median value of its  $k=20$  neighboring entries, such that fluctuating noises within the course  
60 of measurement can be minimized. Clients may adjust their neighboring size around the  
61 recycler's recommendation for the best suit of data. Specifically, we set the neighboring  
62 size for SNL and HNEI as 30 and 25 as an adjustment, while the others remaining 20.

63 (b) **Curve filling.** We obtain the voltage capacity and  $dQ/dV$  curves from the denoised

64 measurements. This includes interpolating the original voltage/capacity measurements  
 65 with the linear interpolation function. Specifically, the recycler recommends the interpolated  
 66 length as  $L=1000$  points. Then the collaborator performs differentiation on the interpolated  
 67 data to derive the incremental capacity curve of both the charging and discharging curves.

68 (c) **Feature engineering.** This includes the extraction of 30 statistical features (e.g.,  
 69 quantiles and kurtosis) as listed in Figure 2. Further details on how the statistical features  
 70 are defined and extracted can be found in Supplementary Note 2. We would also like to  
 71 gently point out that feature engineering can also be considered an ex-post denoising  
 72 process: by extracting only a few key statistics from the characteristic curves, the effect of  
 73 most measurement noises would be neutralized.

74 Of course, in addition to the general procedures of preprocessing, the parameters  
 75 employed for preprocessing should also be aligned across manufacturers. Table R1 below  
 76 provides a list of shared parameters in preprocessing for the above steps.

77 **Table R1 Shared parameter values for data preprocessing**

| Symbol | Meaning                                                                  | Value    |
|--------|--------------------------------------------------------------------------|----------|
| $n$    | Minimum MAD ratio for an in-cycle data entry to be considered an outlier | 3        |
| $k$    | Number of neighboring data entries to be averaged in median filtering    | 20,25,30 |
| $L$    | Interpolated voltage and capacity vector length in feature engineering   | 1000     |

78  
 79 We deliberately retain *human-induced noise* and *cathode heterogeneity-induced noise*  
 80 with the intention of making the model insensitive to these two types of noise. As previously  
 81 mentioned, the source of *human-induced noise* arises from variations in parameter settings  
 82 in feature engineering, as clients may decide on these settings based on the type of battery  
 83 material. The source of *heterogeneity* stems from the possibility that a client may have  
 84 batteries of multiple cathode material types, complicating the data distribution. The  
 85 reported results demonstrate that federated battery recycling is insensitive to both human-  
 86 induced noise (by allowing clients to set different data preprocessing parameters) and  
 87 cathode heterogeneity-induced noise (by permitting clients to have a mix of different  
 88 battery cathode material types). Consequently, our federated machine learning framework  
 89 is broadly applicable to various cathode material sorting under both homogenous and  
 90 heterogenous data scenarios even if allowing the collaborator to preprocess the raw data  
 91 flexibly, showcasing the potential for scalable industry implementation.

92 We do realize, though, that the above data preprocessing details might not be well  
 93 introduced in the original manuscript, which we deeply apologize for. To this end, we add  
 94 the following description to Supplementary Note 1:

95 *“Recyclers often face difficulty identifying the type of retired battery, given poor access*  
 96 *to the full historical operating data. However, battery recyclers need information on the type*  
 97 *of retired batteries to decide on the design of recycling strategies. Therefore, it is necessary*  
 98 *to standardize the retired battery data, even though the battery type and historical usages*

99 are diversified. Our proposed standardized process aims to test retired batteries with a  
100 commonly accessible method and to obtain information about retired batteries. Specifically,  
101 battery information is represented by a voltage-capacity curve and a  $dQ/dV$  curve derived  
102 from the charging and discharging data, respectively. To obtain such curves, battery  
103 recyclers need to encourage the collaborators to charge, and discharge collected retired  
104 batteries for one cycle. The observed data on the charging and discharging characteristics,  
105 after being recorded, are preprocessed according to the unanimous protocol distributed by  
106 the recyclers to generate curves. The protocol first denoises measurement data by (a)  
107 identifying out-of-cycle missing data entries and filling them with their nearest non-missing  
108 data entries; (b) identifying in-cycle outlier data entries (defined as entries outside 3 times  
109 the median-absolute deviation) and replacing them with their nearest non-outlier data  
110 entries; and (c) performing median filtering based on 20 neighboring data (the neighboring  
111 size for SNL and HNEI dataset is 30 and 25, respectively) entries to smooth the data. Next,  
112 the protocol interpolates and differentiates the denoised data to yield the voltage capacity  
113 and  $dQ/dV$  curves, with a recommended interpolation length of 1000 data points. Based  
114 on the data standardization results, feature engineering can be conducted by extracting 30  
115 key statistical features from the generated characteristic curves. It is assumed that  
116 batteries are mandatorily decommissioned when they reach a given threshold, i.e., 80% of  
117 the state of health (defined as the ratio of the current capacity to the nominal capacity) and  
118 are recovered by recyclers. Therefore, data standardization here is equivalent to obtaining  
119 information on the operating status of retired batteries at the end of their life with no  
120 requirements on the historical operational data. It is noted that the decommission threshold  
121 in this work is set as 90% of the nominal capacity of each battery due to the limited sample  
122 size of the batteries that are deemed to be decommissioned.”

123 We sincerely hope that the above explanations have addressed your concerns  
124 regarding the data preprocessing for federated machine learning.

125



126 2. CNN-based methods usually have a better prediction accuracy based on a large dataset,  
127 why not use this method in this paper?

128 Thank you for your constructive comment on the selection of the machine learning  
129 algorithm for federated learning. Briefly speaking, CNN is indeed one of the most powerful  
130 algorithms in learning the underlying patterns of big data, but it might not be the best fit for  
131 our federated learning pipeline, due to the presence of the statistical feature engineering  
132 module as well as the computational cost-effectiveness. Please allow us to elaborate as  
133 follows.

134 First, as presented in Figure 2, our proposed federated learning framework is preceded  
135 by a statistical feature engineering procedure, which extracts 30 key features from each  
136 pair of charging and discharging curves. Feature engineering is standard practice for most  
137 data-driven battery analysis; see, for example, Literatures [R1] and [R2]. Such feature  
138 engineering significantly changes the nature of the dataset, either in mechanism-driven or  
139 in mechanism-agonistic ways, from gigabyte-scale (specifically, 4.17 GB) sequential data  
140 to kilobyte-scale (50kB) tabular data. Decision trees such as random forests might be  
141 better suited to this transformed dataset where the features are small-sized, non-sequential,  
142 and highly heterogeneous [R3]. One can also better interpret the as-trained models to  
143 analyze which extracted features are most fundamental to the determination of battery  
144 cathode types in Figure 3d, because of the inherent feature-wise interpretability of random  
145 forests. While it is still an open question to interpret the network behaviors.

146 Of course, one could argue that the framework can be designed without feature  
147 engineering, where CNNs often yield more accurate models by automatically extracting  
148 salient features from raw data. To this end, we randomly selected 5 batteries in each class  
149 to demonstrate the raw charging/ discharging data, which is fed into the CNN model.

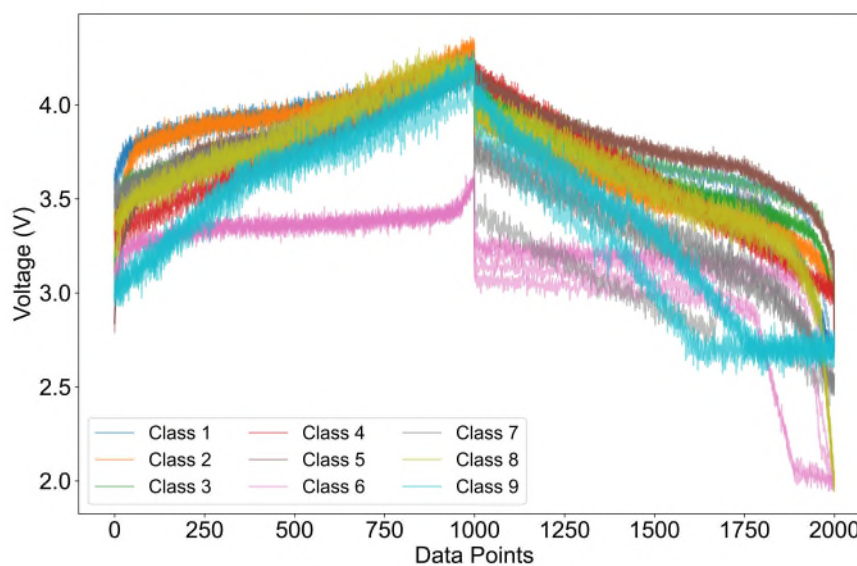

150  
151 **Figure R1 The raw data of battery charging/ discharging curve in each class (after interpolation).**

152 In Figure R1, we interpolate the charging/ discharging data of each class of battery to  
 153 1000 points for a standardized input size to CNN, respectively. Since the battery charging/  
 154 discharging data are in sequential format, we choose a 1D convolutional layer as input.  
 155 The detailed Python CNN implementation prototype is shown in Figure R2:

```
def create_cnn_model(input_shape, num_classes):
    model = Sequential()
    model.add(Conv1D(32, 3, activation='relu', kernel_initializer='he_normal', input_shape=input_shape))
    model.add(MaxPooling1D(2))
    model.add(Dropout(0.25))
    model.add(Conv1D(64, 3, activation='relu', kernel_initializer='he_normal'))
    model.add(MaxPooling1D(2))
    model.add(Dropout(0.25))
    model.add(Flatten())
    model.add(Dense(128, activation='relu', kernel_initializer='he_normal'))
    model.add(Dropout(0.5))
    model.add(Dense(num_classes, activation='softmax'))

    optimizer = tf.keras.optimizers.SGD(learning_rate=0.01, momentum=0.9)
    model.compile(optimizer=optimizer, loss='sparse_categorical_crossentropy', metrics=['accuracy'])

    return model
```

156  
 157

**Figure R2 The implemented CNN prototype with Python3.9.13 version.**

158 In Figure R2, we set the loss function as the sparse categorical cross-entropy loss due  
 159 to the multi-class classification nature. We use the stochastic gradient descent, with a  
 160 learning rate of 0.01 and momentum of 0.9, to optimize the defined loss function of the  
 161 learning process. Given the epochs being 50 and batch size being 128, the constructed  
 162 CNN also provides good classification when the input client data is identical to those  
 163 producing the result in Figure 3a under the independent learning (IL) mode. Frankly,  
 164 through case studies, we find this to be true: without feature engineering, CNN models lead  
 165 to a comparable accuracy of 97% in Figure R3, as compared to 95% for random forests.

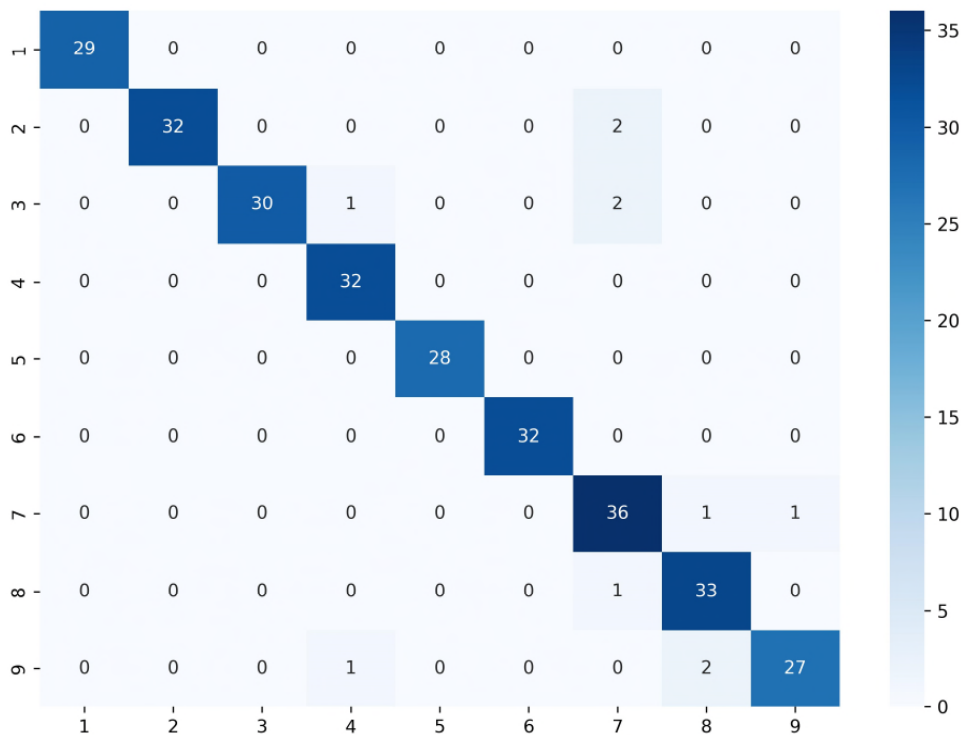

166  
 167

**Figure R3 The confusion matrix of predicted and actual cathode types with client results merged.**

168 However, such a strategy is not feasible in terms of cost-effectiveness: the construction  
 169 and training of a CNN network are computationally expensive, indicating more stringent  
 170 requirements on the data storage memory and computational power of the collaborators.  
 171 Further considering that federated learning is essentially a cross-entity iterative learning  
 172 process, CNNs might significantly slow down the training process. Based on our case study,  
 173 the model training time is recorded from each client. In Figure R4, we calculated the slope  
 174 of the least square regression line of the time-size pairs, where the value of 0.1084  
 175 indicates that one could cost *0.1084 seconds* per sample when using the as-trained CNN  
 176 model. On the contrary, the cost per sample is only *0.0008 seconds* using the random  
 177 forest reported in our work. From our perspective, using random forest would be a more  
 178 acceptable alternative for the collaborators considering the time efficiency. One may notice  
 179 the epochs are impacting the overall training time, but we find that the epochs are small  
 180 enough to produce comparable accuracy compared with the random forest. Therefore,  
 181 such a huge difference in time efficiency lands on the inherited suitability of the random  
 182 forest to the tabular data, thanks to our successful feature engineering, rather than model  
 183 parameter settings or network structure designs.

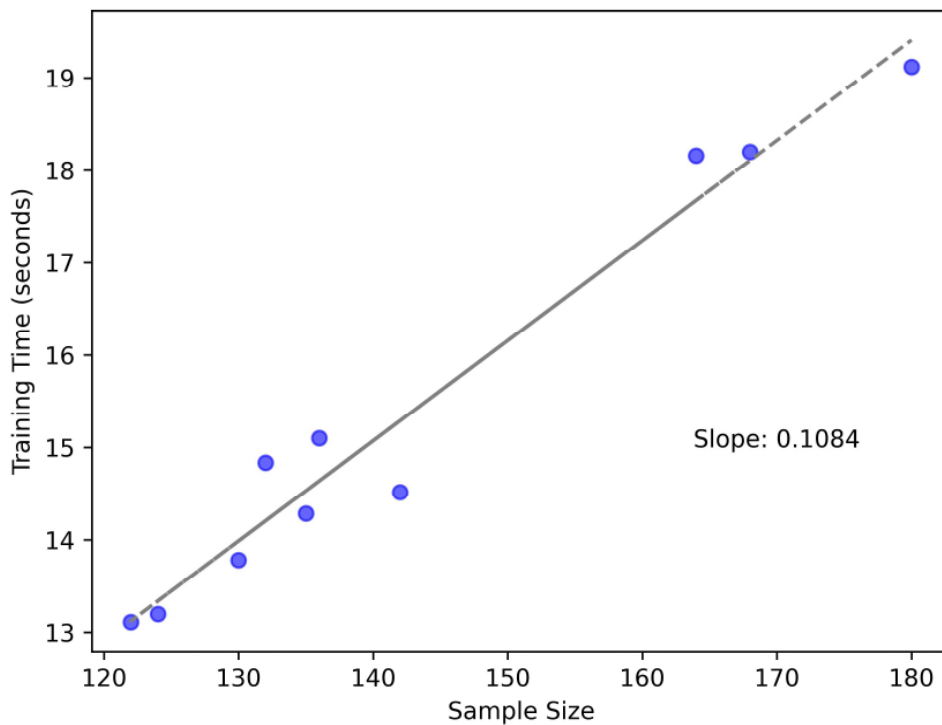

184  
 185 **Figure R4 The CNN training time for each client (each client has a unique sample size).**

186 However, thanks to your reminder, we realize that the unique advantage of random  
 187 forests is not well justified in the current manuscript. To this end, we add the following  
 188 explanations to the Discussions section:

189 *“Specifically, the selection of random forests as the bottom-level machine learning*  
 190 *algorithm, instead of more advanced neural network architectures, is made with full*  
 191 *consideration of the feature engineering settings and cost-effectiveness requirements.*”

192 *Feature engineering, which prepares the data for federated learning with expert-*  
193 *knowledge-based information extraction, transforms the raw gigabyte-scale sequential*  
194 *data into kilobyte-scale tabular data. Decision trees such as random forests are more adept*  
195 *at learning from such low-dimensional data with heterogeneous features, whether in terms*  
196 *of accuracy, efficiency, or interpretability. Also, advanced neural network architectures*  
197 *such as Convolutional Neural Networks (CNNs) require much higher computational power*  
198 *from every collaborating manufacturer, with a significantly lengthened training time.”*  
199

200 3. In the proposed federated machine learning framework, how to transfer parameters and  
201 ensure to avoid missing the received parameters data?

202 Thank you very much for discussing with us the technical details of the parameter  
203 transfer process, which is truly one of the most fundamental building blocks of federated  
204 machine learning in real applications. In our proposal, the shared parameters (namely, the  
205 local cathode sorting probability result) are moderately encrypted by adding random noise  
206 at the model training stage before being directly transferred from the collaborators to the  
207 recyclers. However, just as you kindly pointed out, the transfer process can still be fragile,  
208 and the parameters can end up missing. Extra measures therefore need to be incorporated  
209 to prevent or handle such undesired situations.

210 From our experience, the failure to receive parameters can mainly be attributed to two  
211 causes: (a) inadvertent parameter losses due to communication delay, and computational  
212 overload and (b) intentional parameter abduction/pollution from malicious third parties. Due  
213 to the distinct nature of the two parameter-missing scenarios, we address them separately  
214 as follows.

215 In case of inadvertent parameter losses, the most straightforward and ideal method is  
216 to improve the stability of the distributed communicational channel and computational  
217 resources at the hardware wireless level, such as over-the-air digital aggregation that takes  
218 into account channel noises and perturbations [R4] [R5]. Of course, one must admit that  
219 such random losses are inevitable at times in practical deployment, even if the systems  
220 have been fully upgraded. Fortunately, we find that the proposed framework, consistent  
221 with other state-of-the-art federated learning frameworks [R6] [R7], turns out to be robust  
222 against parameter losses: even if parameters from a few manufacturers end up missing,  
223 the subsequent Wasserstein-distance voting can still be implemented by temporarily  
224 neglecting their presence, and the classification accuracy is only slightly degraded. This  
225 robustness is a natural solution against inevitable parameter losses.

226 To prove the robustness of our WDV method, we designed a simulation experiment to  
227 deliberately discard the parameter to be transferred. Specifically, we randomly discard the  
228 votes from each client with a fixed percentage ratio, i.e., from 0% to 10%, and study the  
229 response to the sorting accuracies. Once a specific vote is hacked, we set the sorting  
230 probability of the vote to 0.5, a random guess. As illustrated in Figure R5, the WDV method  
231 is still robust in a wide range of missing data ratios. For instance, given the heterogeneity  
232 index is 9, the overall classification accuracy is still close to 90% under a 10% data missing  
233 ratio, which can be considered as a severe data missing scenario. One could also find that  
234 the result is still robust under even lower heterogeneity index settings. It is worth noticing  
235 that the sorting accuracy decay in the horizontal direction results from the increased data  
236 distribution complexity among clients (i.e., decreased heterogeneity index), rather than the  
237 sensitivity to the potential data missing in the parameter transfer link.

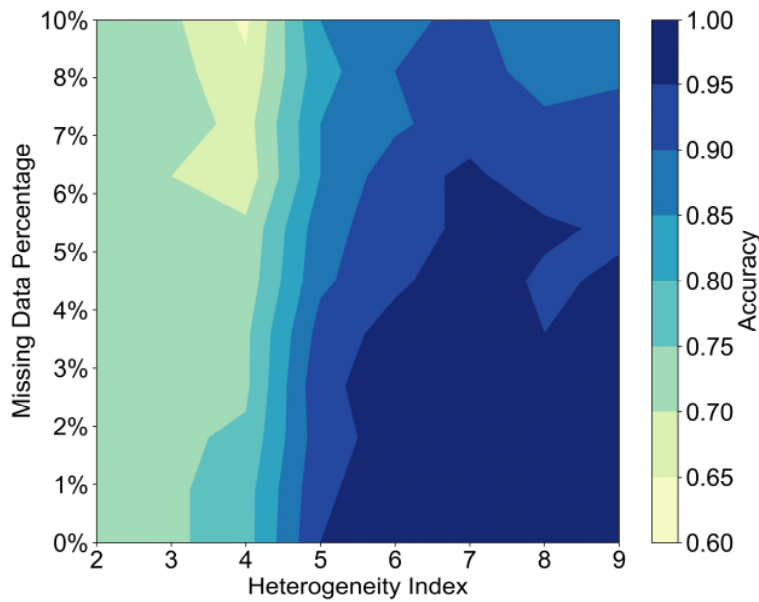

238  
 239 **Figure R5 The overall classification accuracy of the proposed WDV method under unrecoverable**  
 240 **parameter loss and different heterogeneity settings. The client data distribution is randomly**  
 241 **generated with the same method described in the Client Simulation Section.**

242 In case of malicious parameter attacks, related federated machine learning literature  
 243 mostly chooses to design transfer mechanisms that can verify [R8] and protect [R9] the  
 244 transferred parameters, such that third parties have fewer motivations or measures in  
 245 maliciously maneuvering the transferred parameters. Verification approaches include  
 246 cryptographic signatures [R10] and smart contracts in blockchains [R11]; protection  
 247 approaches are mostly based on encryption techniques such as homomorphic encryption  
 248 [R12] and differential privacy [R13]. In our proposed framework, thanks to your reminder,  
 249 we have newly incorporated an RSA-based encryption scheme [R14] for both the  
 250 verification and protection of parameters. In the verification stage, RSA is employed to  
 251 create an avenue for verifying the authenticity of the parameter publisher. In the protection  
 252 stage, RSA is employed to encrypt the parameters into ciphertexts. Additional technical  
 253 approaches such as IP whitelisting/blacklisting can also be helpful in preventing third  
 254 parties from even knowing that the parameter transfer is underway.

255 Despite the safe and reliable communication issues that are still open questions in  
 256 federated machine learning, the inherent nature of feature engineering and random forests  
 257 guarantee that there is scarcely an overwhelming number of parameters to transfer  
 258 (kilobytes at best). This can be extremely advantageous in inhibiting parameter losses: the  
 259 issue of inadvertent communicational and computational delays would be mild, and the  
 260 verification/protection of parameters would not be time-consuming.

261 The above methods newly adopted in the framework are also introduced in the  
 262 *Discussion* section of the manuscript as follows:

263 *“Supplementary Figure 10 shows that, despite such an idea assumption, the random*  
 264 *forest model, incorporated with the Wasserstein distance voting, is naturally robust against*

265 *random parameter transfer losses even if parameters from a few collaborators end up*  
266 *missing. The sorting accuracy only slightly degrades given the same heterogeneity setting.”*

267 We sincerely hope that you would also consider these methods suitable for addressing  
268 different types of parameter losses.

269

270 **Response to Reviewer #2**

271 The proposed paper raises an important topic in the context of sustainable development  
272 and the policy of product life cycle in the closed circular economy model. It has been  
273 proposed to use Federal Machine Learning to classify retired batteries (in particular  
274 cathode material sorting), assuming that prior information about historical operating  
275 conditions is known simultaneously in accordance with protecting the personal data of  
276 recyclers. However, I have the following concerns:

277 Dear Respected Reviewer,

278 Thank you very much for taking your precious time to review our paper. We genuinely  
279 appreciate the positive attitude you hold towards our research paper, as well as your  
280 constructive comments that help us further improve it.

281 In the following, we will address your comments in a point-by-point manner, with hopes  
282 of further clarifying the research scope and implementation details. Accordingly, the  
283 original manuscript and supplementary files are carefully revised, with changes highlighted  
284 in blue in this response letter, to help readers better understand our research. Accordingly,  
285 we made careful revisions to the original manuscript and supplementary information, where  
286 you might find the corresponding revisions using “track changes” mode. We believe that  
287 your professional suggestions have guided us to bring our revised manuscript up to a new  
288 level, and hopefully, this revised version will also meet your expectations of a qualified  
289 research paper as a decent *Nature Communications* publication.

290



291 1. Thus, the decision trees are a commonly used approach, it is not known whether the  
292 authors developed and implemented the codes themselves, or whether they used ready-  
293 made Matlab-type packages or ready-made libraries in the Python language.

294 Thank you very much for bringing into question the source of coding, which admittedly  
295 was not well elucidated in the original manuscript. We would like to apologize for neglecting  
296 this issue. To make up for this, we wish to make the following clarifications:

297 a) Random forest, as the bottom-level machine learning algorithm (i.e., the base learner  
298 in the federated machine learning framework), is implemented with readily available  
299 MATLAB packages (more specifically, the *TreeBagger* function in the Statistics and  
300 Machine Learning Toolbox). Such packages enjoy high prediction performances in terms  
301 of classification accuracy and computational efficiency and thus relieve us from the burden  
302 of developing our own codes from scratch.

303 b) The high-level federated learning framework that coordinates the collaborative  
304 learning process, specially invented Wasserstein-distance voting and the transfer of  
305 intermediate model parameters, is coded from scratch on our own design, which is also in  
306 MATLAB language.

307 We would like to open our key coding and the readers can refer to the *Code Availability*  
308 section to see how the existing random forest packages and the self-developed federated  
309 learning programs interact with each other to achieve the final collaborative classification.  
310 We have also added the following explicit clarifications to the *Method-Client model and*  
311 *Federated learning* section:

312 *“The bottom-level random forest algorithm (client model) is implemented using readily*  
313 *available MATLAB packages (more specifically, the TreeBagger function in the Statistics*  
314 *and Machine Learning Toolbox). The MATLAB version is R2022a, and the code runs on a*  
315 *personal computer with Intel (R) Core (TM) i5-10400 CPU @ 2.90GHz RAM 8 GB.”*

316 ...

317 *“The higher-level federated learning framework, including the Wasserstein-distance*  
318 *voting and the transfer of parameters, is implemented from scratch.”*

319 We sincerely hope that the above clarification is sufficient for readers to understand the  
320 detailed origins of the codes.

321

322 2. There is also no description of the neural network (including its structure/topology,  
323 number of layers, number of neurons, input description, output description, and network  
324 diagram). Some explanations/arguments for the selection of a neural network just as  
325 proposed should also be given.

326 Thank you for kindly reminding us of the fact that we failed to provide selected values  
327 of hyperparameters, alongside the justification for selecting these values. We are very  
328 sorry for this neglect, as it may affect the reproducibility of codes and the evaluation of  
329 modeling results. Moreover, we apologize for any potential confusion that we used a  
330 neural network as the client model. Instead, we used the random forest as the client model.  
331 Regarding the detailed description of the random forest, we only compulsorily set the  
332 number of trees in each random forest as 10, which can be regarded as a standardized  
333 procedure initialized by the battery recycler. In Figure R6, we use the out-of-bag  
334 classification error to rationalize the selection of 10 as the standard number of trees in the  
335 random forest. Note that each tree in the random forest is independently grown on a  
336 drawn bootstrap replication of the input data. Those samples that are not in such  
337 replication are called out-of-bag. Therefore, the out-of-bag classification error evaluates  
338 the generalization of the unseen dataset. It turns out that the out-of-bag classification error  
339 first rapidly decreases and then asymptotically decreases at the point where the number  
340 of trees is 10. Since the input data of Figure R6 is from client 2, who owns up to 8 classes  
341 of batteries, a most challenging classification task among all the heterogeneous settings  
342 described in Supplementary Table 5, we select the number of trees as 10 to ensure an  
343 adequate model capacity for other clients while avoiding redundant computation burden.

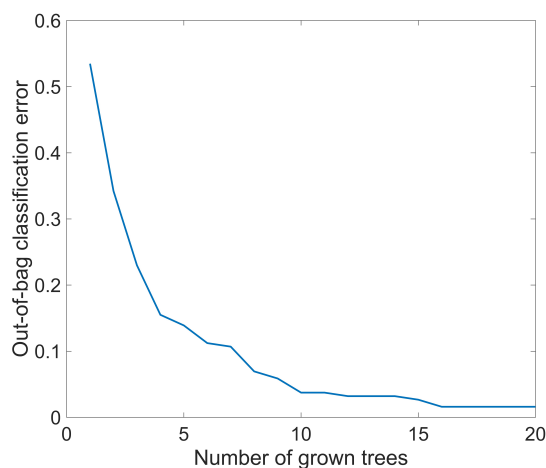

344

345 **Figure R6 The out-of-bag classification error against the number of trees in the random forest.**

346 Regarding other hyperparameters, we alternatively let the collaborators learn the most  
347 suitable random forest structure by themselves, rather than fix the parameters since each  
348 collaborator could have very different battery numbers and cathode material types, hence

349 different model parameter settings. By only presetting the number of trees in the random  
 350 forest, the collaborators could have enough flexibility to train the best model that suits  
 351 their own data distribution. The detailed selection of hyperparameter, i.e., the number of  
 352 trees  $n$ , is listed in Table R2.

353 **Table R2 Selected hyperparameter values of the random forest algorithm**

| Symbol | Meaning                              | Value |
|--------|--------------------------------------|-------|
| $n$    | Number of trees in the random forest | 10    |

354  
 355 The model input size  $d_{input}$  and output size  $d_{output}$  are summarized in Table R3,  
 356 where  $m$  is the sample size in each client and 30 is the extracted feature number.

357 **Table R3 The input and output shape of the random forest algorithm**

| Symbol       | Meaning                              | Value     |
|--------------|--------------------------------------|-----------|
| $d_{input}$  | The input size to the random forest  | $m$ by 30 |
| $d_{output}$ | The output size of the random forest | $m$ by 1  |

358  
 359 The above explanations have been added to the Methods-Client model section as  
 360 follows:

361 *“The number of trees in each random forest is fixed at ten, i.e.,  $J = 10$  for a balanced*  
 362 *classification accuracy and computation cost. We deliberately let the collaborators (clients)*  
 363 *learn the most suitable random forest structure, i.e., the model parameters, by themselves,*  
 364 *rather than fixing the parameters since each collaborator could have very different battery*  
 365 *numbers and cathode material types. By only presetting the number of trees in the random*  
 366 *forest, the collaborators could have enough flexibility to train the best model that suits their*  
 367 *own data distribution. The bottom-level random forest algorithm (client model) is*  
 368 *implemented using readily available MATLAB packages, more specifically, the TreeBagger*  
 369 *function in the Statistics and Machine Learning Toolbox. The MATLAB version is R2022a,*  
 370 *and the code runs on a personal computer with Intel (R) Core (TM) i5-10400 CPU @*  
 371 *2.90GHz RAM 8 GB.”*

372 Here are the explanations/arguments for the selection of the random forest, rather  
 373 than other advanced machine learning approaches, for instance, convolutional neural  
 374 network (CNN).

375 Briefly speaking, advanced machine learning approaches such as CNN are indeed one  
 376 of the most powerful algorithms in learning the underlying patterns of big data, but they  
 377 might not be the best fit for our federated learning pipeline, due to the presence of the  
 378 statistical feature engineering module as well as the computational cost-effectiveness.

379 First, as presented in Figure 2, our proposed federated learning framework is preceded

380 by a statistical feature engineering procedure, which extracts 30 key features from each  
381 pair of charging/discharging curves. Feature engineering is standard practice for most  
382 data-driven battery analysis; see, for example, Literatures [R1] and [R2]. Such feature  
383 engineering significantly changes the nature of the dataset, from gigabyte-scale  
384 (specifically, 4.17 GB) sequential data to kilobyte-scale (50kB) tabular data. Decision trees  
385 such as random forests might be better suited to this transformed dataset where the  
386 features are small-sized, non-sequential, and highly heterogeneous [R3]. One can also  
387 better interpret the as-trained models to analyze which extracted features are most  
388 fundamental to the determination of battery cathode types in Figure 3d, because of the  
389 inherent feature-wise interpretability of random forests. While it is still an open question to  
390 interpret the network behaviors.

391 To better clarify the motivation for selecting random forest as the base learner, we add  
392 the following explanations to the Discussions section:

393 *“Specifically, the selection of random forests as the bottom-level machine learning*  
394 *algorithm, instead of more advanced neural network architectures, is made with full*  
395 *consideration of the feature engineering settings and cost-effectiveness requirements.*  
396 *Feature engineering, which prepares the data for federated learning with expert-*  
397 *knowledge-based information extraction, transforms the raw gigabyte-scale sequential*  
398 *data into kilobyte-scale tabular data. Decision trees such as random forests are more adept*  
399 *at learning from such low-dimensional data with heterogeneous features, whether in terms*  
400 *of accuracy, efficiency, or interpretability. Also, advanced neural network architectures*  
401 *such as Convolutional Neural Networks (CNNs) require much higher computational power*  
402 *from every collaborating manufacturer, with a significantly lengthened training time and*  
403 *compromised model interpretability.”*

404

405

406 3. Does the use of the proposed approach allow you to reduce the costs of recycling (taking  
407 into account the rescaling of the procedure and its implementation in practice) compared  
408 to the procedure of extracting natural resources? What is the main conclusion of the article?  
409 This should be clearly stated in the article, especially in the Abstract.

410 We appreciate your insightful comment. In fact, using federated learning to sort cathode  
411 materials for retired batteries cannot reduce the cost of direct battery recycling. On the  
412 contrary, since direct battery recycling requires more cost inputs of raw materials and  
413 chemical reagents in the pretreatment stage, its cost is higher than the procedure of  
414 extracting natural resources (specifically, hydrometallurgy and pyrometallurgy). It is worth  
415 noting that the excess cost of direct battery recycling is not caused by the sorting of retired  
416 batteries assisted by federated learning. This is the intrinsic feature of the direct recycling  
417 method that the recyclers carefully preprocess retired batteries and repair possible  
418 electrode defects. The recycling product is functionalized electrodes or electrode materials  
419 rather than alloy powder produced by hydrometallurgy and pyrometallurgy. The cost  
420 comparison between direct recycling and the procedure of extracting natural resources is  
421 shown item-wise in Figure 5a. For the same cathode material, direct recycling has the  
422 highest cost, and the main source of excess cost is chemical reagents and raw materials  
423 such as lithium supplements.

424 Pyrometallurgy recycling ultimately produces a metal alloy, while hydrometallurgy  
425 recycling generates lithium salt and precursor materials. In contrast, direct recycling leads  
426 to the regeneration of battery materials. These products have varying degrees of added  
427 value, leading to differences in the profitability associated with the three recycling  
428 strategies. Hence, even though direct recycling methods may entail slightly higher costs,  
429 they can yield significantly greater benefits than traditional recycling methods, particularly  
430 for NCM. However, direct recycling methods, as a promising technology, are still in the  
431 laboratory stage. Specifically, in the laboratory, materials scientists concentrate on  
432 addressing distinct failure issues found in specific cathode materials. Repair strategies are  
433 highly variable, primarily due to the differing failure mechanisms observed in various  
434 materials. To illustrate, let's consider the antisite issue. To achieve precise targeted repair,  
435 addressing Li/Ni antisite issues in spent NCM cathodes often necessitates an oxidation  
436 reaction to convert  $\text{Ni}^{2+}$  back to  $\text{Ni}^{3+}$ . In contrast, for spent LFP cathodes, it is typically  
437 necessary to create a reducing environment that encourages the return of  $\text{Fe}^{3+}$  ions, which  
438 occupy the Li layer, to their original positions. These tailored strategies align with the  
439 specific requirements of each cathode material. Hence, to transition direct recycling to real  
440 industrial applications, a critical first step is the rapid sorting of retired batteries.  
441 Considering the current state of development in direct recycling technology, it is generally

442 challenging to directly recycle mixed and unsorted retired batteries without proper  
443 classification.

444 Therefore, the main conclusion of this article is that using only field test data, rather  
445 than battery historical data, to sort retired batteries is a key step toward the industrial  
446 application of direct recycling. Furthermore, the accuracy of retired battery sorting will  
447 greatly affect the profit of direct recycling, which we have analyzed in Figure 5f. Specifically,  
448 when battery data cannot be shared due to privacy restrictions, recyclers can only use  
449 independent learning (IL) for modeling, where the profit of direct recycling is low. This is  
450 because a large number of retired batteries of different cathode materials are misclassified,  
451 resulting in the wrong chemical reagents being added, further leading to the generation of  
452 unqualified products. Using the federated learning framework we proposed, the data  
453 privacy of collaborators is protected, and the high sorting accuracy allows recyclers to add  
454 appropriate chemical reagents to the identified cathode materials for repair, further  
455 generating higher recycling profits.

456 To better clarify the scope of our work, we have made the modifications in the Abstract,  
457 and Conclusion part of the manuscript:

458 *“Unsorted retired batteries with mixed cathode materials impede the industry*  
459 *deployment of direct recycling due to the cathode-specific nature. Given the high*  
460 *profitability, accurately classifying the imminent surging of retired batteries is critical for the*  
461 *commercial use of direct recycling. However, historical operation conditions, manufacturer*  
462 *variability, and data privacy concerns from recycling collaborators (data owners) have*  
463 *remained major challenges. In this work, we collect an out-of-distribution dataset consisting*  
464 *of 130 lithium-ion batteries, across 5 cathode materials from 7 manufacturers. A federated*  
465 *machine learning framework is proposed to classify these diverse retired batteries without*  
466 *assuming any prior information on historical operation conditions and to protect the data*  
467 *privacy of multiple recycling collaborators. With only one cycle of the end-of-life charging*  
468 *and discharging data tested at the recycling end, our model achieves 1% and 3% cathode*  
469 *material sorting errors using such one cycle of field available data, rather than any historical*  
470 *data, under both homogeneous and heterogeneous recycling circumstances, respectively,*  
471 *thanks to our proposed Wasserstein-distance voting strategy. The economic evaluation*  
472 *shows the relevance and necessity of our accurate retired battery sorting to a profitable*  
473 *and sustainable recycling industry in the future. This work enlightens the possibilities of*  
474 *leveraging the existing privacy-sensitive data from multiple collaborators to develop and*  
475 *optimize complex decision-making procedures in a collaborative and privacy-preserving*  
476 *manner.”*

477 ...

478 “Federated machine learning is a promising route for retired battery sorting and enables  
479 emerging battery recycling technologies, *especially direct recycling*, in their development,  
480 practical application, and optimization. We create a retired battery sorting model using only  
481 one cycle of end-of-life charging and discharging data *as opposed to any historical data*  
482 while preserving the data privacy budgets of multiple *battery recycling collaborators*. In the  
483 homogeneous setting, we obtain a 1% *cathode material sorting error*; in the heterogeneous  
484 setting, we obtain a 3% *cathode material sorting error*, thanks to our Wasserstein-distance  
485 voting strategy. Such a level of accuracy is achieved by (1) automatically exploring the  
486 unique patterns in the salient features without assuming any prior knowledge of historical  
487 operation conditions and (2) using our proposed Wasserstein-distance voting strategy to  
488 correct heterogeneous data distribution among recycling collaborators. An economic  
489 evaluation showcases the relevance and necessity of accurate retired battery sorting to  
490 the profitable battery recycling industry *using direct recycling*. In general, our approach can  
491 complement the existing first-principle-based recycling route research paradigms on actual  
492 battery recycling practice, where retired batteries are necessary while *challenging to sort*.  
493 Broadly speaking, our work enlightens the possibilities of leveraging existing data from  
494 multiple data owners, *rather than time-consuming and expensive data generations, to*  
495 *develop and optimize* complex decision-making procedures such as the battery recycling  
496 route design in a collaborative while privacy-preserving fashion.  
497 ”

498 4. Thus, the information concerning testing the retired batteries at the current cycle,  
499 specifically, with a complete charging-discharging cycle is not the common approach in the  
500 case of general lithium-ion batteries. The lithium-ion batteries come not only from electric  
501 vehicles, thus the authors will praise their method as one that does not require knowledge  
502 of historical data on battery life, while very often this data is unknown, also user data are  
503 unknown (so it is not possible to use them in calculations anyway). This is possible only in  
504 the case of batteries coming from electric vehicles. What chances does the proposed  
505 technique have for practical application?

506 We sincerely appreciate the comment since it raises a critical concern about the use  
507 case of lithium-ion batteries. As you kindly suggested a complete charging-discharging  
508 cycle is not common in the electric vehicle scenario, which is true. However, for other use  
509 cases such as the battery design stage, and battery manufacturing stage (quality control),  
510 the complete charging-discharging cycle is standard since the battery designer and the  
511 battery manufacturer are finding valuable insights into the battery material formula, and  
512 manufacturing variabilities. The core idea of using complete charging and discharging  
513 cycles is to ensure that no extra variabilities are introduced by dynamic charging or  
514 discharging. We also take a similar idea when dealing with the battery recycling scenario.  
515 Considering the highly heterogeneous data distribution of the retired batteries, if the  
516 recycler wants to gain insights into the diversified cathode material types by studying the  
517 voltage response curves, then the complete charging and discharging procedures should  
518 be standardized to avoid any extra variabilities.

519 We also admit that lithium-ion batteries have not only retired from electric vehicles but  
520 also from various applications such as data center energy storage systems, power grid  
521 energy storage systems, and consumer electronics. As you kindly commented, the battery  
522 data is very often unknown, which is also the starting point of our idea that the battery  
523 recycling scenario has very diversified battery origins and has no access to historical data.  
524 Therefore, it is not possible to use the historical data in calculations anyway. To this end,  
525 we use the data at the “current cycle” to emphasize that our method requires no historical  
526 information on the retired batteries. Specifically, the concept of the “current cycle” means  
527 that the battery recycler tests the retired batteries with a charging/ discharging procedure,  
528 regardless of any historical use conditions. However, we admit that this “current cycle”  
529 could lead to potential confusion. We have accordingly made corrections in the Abstract,  
530 Conclusion section, and relevant phrases in the main body of the manuscript (only the  
531 modified Abstract and Conclusion part is pasted below for your easier reference):

532 *“...With only one cycle of the end-of-life charging and discharging data tested at the*  
533 *recycling end, our model achieves 1% and 3% cathode material sorting errors using such*  
534 *one cycle of field available data, rather than any historical data...”*



535 ...

536 *“...We create a retired battery sorting model using only one cycle of end-of-life*  
537 *charging and discharging data as opposed to any historical data while preserving the data*  
538 *privacy budgets of multiple battery recycling collaborators...Such a level of accuracy is*  
539 *achieved by (1) automatically exploring the unique patterns in the salient features without*  
540 *assuming any prior knowledge of historical operation conditions and...”*

541 Therefore, our proposed method is designed in the first place for practical applications  
542 under the retired battery sorting scenario, where historical data access is hardly available.  
543 Despite the diversified cathode material types of the retired batteries, the recycling  
544 collaborators only charge and discharge the batteries for one cycle to retrieve the field-  
545 testing data, which brings huge flexibility to the collaborative retired battery sorting. We  
546 even set no restrictions on the origin of the retired batteries, such that the trained model is  
547 more generalized in practical battery recycling scenarios. We hope that our explanation  
548 could alleviate your justified concerns about the practical issues in the industrialization of  
549 direct battery recycling.

550

551 5. Some last references in the field of retired batteries with machine learning are also  
552 missing:

553 - Zhang, Y., Tang, Q., Zhang, Y. et al. Identifying degradation patterns of lithium ion  
554 batteries from impedance spectroscopy using machine learning. Nat Commun 11, 1706  
555 (2020). <https://doi.org/10.1038/s41467-020-15235-7>

556 - Lv, C., Zhou, X., Zhong, L., Yan, C., Srinivasan, M., Seh, Z. W., Liu, C., Pan, H., Li, S.,  
557 Wen, Y., Yan, Q., Machine Learning: An Advanced Platform for Materials Development  
558 and State Prediction in Lithium-Ion Batteries. Adv. Mater. 2022, 34, 2101474.  
559 <https://doi.org/10.1002/adma.202101474>

560 - Ng, MF., Zhao, J., Yan, Q. et al. Predicting the state of charge and health of batteries  
561 using data-driven machine learning. Nat Mach Intell 2, 161–170 (2020).  
562 <https://doi.org/10.1038/s42256-020-0156-7>

563 Thank you very much for your suggestion on the list of references. After a careful read  
564 of all three papers, we do find them to be highly relevant to our paper, as they are all  
565 centered around the topic of machine-learning-based battery performance evaluation.  
566 Moreover, they focus on different stages of the battery life cycle, including development,  
567 in-service, and recycling, and are all highly accredited in their respective areas. Citing the  
568 mentioned literature would significantly increase the comprehensiveness of the existing  
569 literature review. Therefore, in the revised manuscript, we include these references in the  
570 *Introduction* section:

571 *“In other battery-related topics, machine learning has recently allowed us to*  
572 *automatically discover complex battery mechanisms [17-19], predict remaining useful life*  
573 *[20-23], evaluate the state of health [19, 24, 25], optimize the cycling profile [26, 27], and*  
574 *approximate the failure distribution [28], even to guide the battery design [29, 30] and*  
575 *predict life-long performance immediately after manufacturing [31]...*

576 *[19] Zhang Y, Tang Q, Zhang Y, Wang J, Stimming U, Lee A A. Identifying degradation*  
577 *patterns of lithium ion batteries from impedance spectroscopy using machine learning.*  
578 *Nature Communications 11. 2020.*

579 *[25] Ng M-F, Zhao J, Yan Q, Conduit G J, Seh Z W. Predicting the state of charge and*  
580 *health of batteries using data-driven machine learning. Nature Machine Intelligence 2.*  
581 *2020:161-70.*

582 *[30] Lv C, Zhou X, Zhong L, Yan C, Srinivasan M, Seh Z W, et al. Machine learning:*  
583 *an advanced platform for materials development and state prediction in lithium-ion*  
584 *batteries. Advanced Materials 34(25). 2022: 2101474.”*

585 Again, we would like to express our gratitude to you for recommending such high-  
586 quality journals as references, so that the literature review can now be complete and more  
587 well-rounded.

588

589 6. And finally, the figures are of low quality. This issue should be definitively improved.

590 Thank you very much for pointing out the quality issue of the figures. We are truly sorry  
591 that we failed to generate the figures in a clear and readable format, which must have  
592 caused you many unnecessary troubles in trying to review our work.

593 To fix this issue, we have regenerated all figures with higher resolution, and have made  
594 sure that the figure quality is not degraded when the manuscript is converted to PDF format.  
595 Additionally, we enlarge the fonts for most figures in the manuscript and supplementary  
596 information, so that readers can read information more conveniently.

597 We sincerely hope that you will also find the revised figures decent in quality and ready  
598 for publication.

599

600 Thus, this paper is very interesting and the results obtained are of high importance taking  
601 into account environmental-based issues. However, due to the above comments, I would  
602 recommend the article for publication, provided that the above concerns will be addressed.  
603 I recommend a Major Revision.

604 Again, we would like to thank you so much for agreeing to review our paper, and for  
605 providing such positive and constructive feedback. We sincerely hope that our carefully  
606 prepared responses and revisions can alleviate all your concerns about our proposed  
607 federated battery classification method and that the paper is more suitable for publication  
608 in *Nature Communications*.

609

610 **References**

- 611 [R1] Zhang Y, Tang Q, Zhang Y, Wang J, Stimming U, Lee AA. Identifying degradation patterns of lithium  
612 ion batteries from impedance spectroscopy using machine learning. *Nature communications*. 2020  
613 Apr 6;11(1):1706.
- 614 [R2] Roman D, Saxena S, Robu V, Pecht M, Flynn D. Machine learning pipeline for battery state-of-health  
615 estimation. *Nature Machine Intelligence*. 2021 May;3(5):447-56.
- 616 [R3] Shwartz-Ziv R, Armon A. Tabular data: Deep learning is not all you need. *Information Fusion*. 2022  
617 May 1;81:84-90.
- 618 [R4] Zhu G, Du Y, Gündüz D, Huang K. One-bit over-the-air aggregation for communication-efficient  
619 federated edge learning: Design and convergence analysis. *IEEE Transactions on Wireless*  
620 *Communications*. 2020 Nov 26;20(3):2120-35.
- 621 [R5] Elgabri A, Park J, Issaid CB, Bennis M. Harnessing wireless channels for scalable and privacy-  
622 preserving federated learning. *IEEE Transactions on Communications*. 2021 May 10;69(8):5194-  
623 208.
- 624 [R6] Ye H, Liang L, Li GY. Decentralized federated learning with unreliable communications. *IEEE journal*  
625 *of selected topics in signal processing*. 2022 Feb 18;16(3):487-500.
- 626 [R7] Han Z, Zhou L, Ge C, Li J, Liu Z. Robust privacy - preserving federated learning framework for IoT  
627 devices. *International Journal of Intelligent Systems*. 2022 Nov;37(11):9655-73.
- 628 [R8] Peng Z, Xu J, Chu X, Gao S, Yao Y, Gu R, Tang Y. Vfchain: Enabling verifiable and auditable  
629 federated learning via blockchain systems. *IEEE Transactions on Network Science and Engineering*.  
630 2021 Jan 12;9(1):173-86.
- 631 [R9] Qi T, Wu F, Wu C, He L, Huang Y, Xie X. Differentially private knowledge transfer for federated  
632 learning. *Nature Communications*. 2023 Jun 24;14(1):3785.
- 633 [R10] Kanchan S, Choi BJ. Group Signature Based Federated Learning Approach for Privacy Preservation.  
634 In *2021 International Conference on Electrical, Computer and Energy Technologies (ICECET) 2021*  
635 *Dec 9 (pp. 1-6)*. IEEE.
- 636 [R11] Kim H, Park J, Bennis M, Kim SL. Blockchain-based on-device federated learning. *IEEE Communications*  
637 *Letters*. 2019 Jun 10;24(6):1279-83.
- 638 [R12] Fang H, Qian Q. Privacy preserving machine learning with homomorphic encryption and federated  
639 learning. *Future Internet*. 2021 Apr 8;13(4):94.
- 640 [R13] Wei K, Li J, Ding M, Ma C, Yang HH, Farokhi F, Jin S, Quek TQ, Poor HV. Federated learning with  
641 differential privacy: Algorithms and performance analysis. *IEEE Transactions on Information*  
642 *Forensics and Security*. 2020 Apr 17;15:3454-69.
- 643 [R14] Zhou X, Tang X. Research and implementation of RSA algorithm for encryption and decryption. In  
644 *Proceedings of 2011 6th international forum on strategic technology 2011 Aug 22 (Vol. 2, pp. 1118-*  
645 *1121)*. IEEE.

## **REVIEWERS' COMMENTS**

### **Reviewer #1 (Remarks to the Author):**

I have carefully reviewed the revised manuscript, and I appreciate the effort put into addressing the concerns raised during the initial review. The authors have made significant improvements to the paper, and many of the previously identified issues have been adequately addressed. Based on my assessment, I recommend accepting this manuscript for publication.

### **Reviewer #2 (Remarks to the Author):**

The Authors took my comments into account and I recommend the paper for publication.

# Response to Reviewer Comments

\*\*\*\*\*

|                      |                                                                                                                                                                                                       |
|----------------------|-------------------------------------------------------------------------------------------------------------------------------------------------------------------------------------------------------|
| <b>Title</b>         | Collaborative and privacy-preserving retired battery sorting for profitable direct recycling via federated machine learning                                                                           |
| <b>Authors</b>       | Shengyu Tao, Haizhou Liu, Chongbo Sun, Haocheng Ji, Guanjun Ji, Zhiyuan Han, Runhua Gao, Jun Ma, Ruifei Ma, Yuou Chen, Shiyi Fu, Yu Wang, Yaojie Sun, Yu Rong, Xuan Zhang, Guangmin Zhou, Hongbin Sun |
| <b>Journal</b>       | Nature Communications                                                                                                                                                                                 |
| <b>Manuscript ID</b> | NCOMMS-23-27860A                                                                                                                                                                                      |

\*\*\*\*\*

## Table of Contents

|   |                               |   |
|---|-------------------------------|---|
| 1 | Response to Reviewers.....    | 2 |
| 2 | Response to Reviewer #1 ..... | 2 |
| 3 | Response to Reviewer #2.....  | 3 |

4 **Response to Reviewers**

5 **Response to Reviewer #1**

6 I have carefully reviewed the revised manuscript, and I appreciate the effort put into  
7 addressing the concerns raised during the initial review. The authors have made significant  
8 improvements to the paper, and many of the previously identified issues have been  
9 adequately addressed.

10 Based on my assessment, I recommend accepting this manuscript for publication.

11 Dear Respected Reviewer,

12 We express our sincere thanks to your time and professional review comments. We  
13 are very pleased that you find our work lives up to your expectations of a decent *Nature*  
14 *Communications* publication.

15



16 **Response to Reviewer #2**

17 The Authors took my comments into account and I recommend the paper for publication.

18 Dear Respected Reviewer,

19 Thank you very much for taking your precious time to review our paper. We genuinely  
20 appreciate the positive attitude you hold towards our research paper, which meets your  
21 expectations of a qualified research paper as a decent *Nature Communications* publication.
